# Supplementary material for: The effects of temperature on the defensive strikes of rattlesnakes
Source: Oxford University Press journal article supplement (doi:10.1242/jeb.223859), 2020-01-01
Supplement: jeb223859supp.pdf [file jeb223859supp.pdf]

## Supplementary material

**Table S1:** Results of models assessing systematic changes in strike performance resulting from fatigue for repeated strikes within a treatment

| Variable                 | Strike Order P-value |                    |
|--------------------------|----------------------|--------------------|
|                          | Western Rattlesnake  | Mohave Rattlesnake |
|                          | 15°C                 |                    |
| Max. strike velocity     | 0.27                 | 0.41               |
| Max. strike acceleration | 0.63                 | 0.08               |
|                          | 20°C                 |                    |
| Max. strike velocity     | 0.86                 | 0.48               |
| Max. strike acceleration | 0.61                 | 0.26               |
|                          | 25°C                 |                    |
| Max. strike velocity     | 0.88                 | 0.89               |
| Max. strike acceleration | 0.57                 | 0.79               |
|                          | 30°C                 |                    |
| Max. strike velocity     | 0.76                 | 0.65               |
| Max. strike acceleration | 0.66                 | 0.13               |
|                          | 35°C                 |                    |
| Max. strike velocity     | 0.63                 | 0.08               |
| Max. strike acceleration | 0.17                 | 0.7                |

**Table S2: Results of generalized linear mixed models examining the effects of cloacal temperature and strike distance on Mohave rattlesnake strike performance. Bolded rows indicate a statistically significant effect of temperature.**

| Variable                              | Strike distance P-value | Temperature P-value | Temperature slope | Temperature intercept | Q10          | 1/Q10        |
|---------------------------------------|-------------------------|---------------------|-------------------|-----------------------|--------------|--------------|
| <b>15-25°C</b>                        |                         |                     |                   |                       |              |              |
| <b>Max. strike velocity</b>           | <b>0.0361</b>           | <b>0.0104</b>       | <b>0.011</b>      | <b>0.249</b>          | <b>1.297</b> | <b>0.771</b> |
| <b>Max. strike acceleration</b>       | <b>0.1915</b>           | <b>0.0085</b>       | <b>0.017</b>      | <b>1.460</b>          | <b>1.495</b> | <b>0.669</b> |
| <b>Max. gape angular velocity</b>     | <b>0.2107</b>           | <b>0.0033</b>       | <b>0.016</b>      | <b>1.470</b>          | <b>1.436</b> | <b>0.696</b> |
| Max. gape angular acceleration        | 0.4744                  | 0.1694              | 0.012             | 3.506                 | 1.313        | 0.762        |
| Min. time to max gape                 | 0.1064                  | 0.0849              | -0.007            | 1.981                 | 0.845        | 1.183        |
| Strike distance                       | NA                      | 0.1459              | 0.014             | 0.860                 | 1.384        | 0.723        |
| Strike latency                        | NA                      | 0.1864              | -0.081            | 3.312                 | 0.156        | 6.410        |
| <b>Mean strike velocity</b>           | <b>0.0019</b>           | <b>0.0062</b>       | <b>0.013</b>      | <b>-0.152</b>         | <b>1.356</b> | <b>0.737</b> |
| <b>15-35°C</b>                        |                         |                     |                   |                       |              |              |
| <b>Max. strike velocity</b>           | <b>0.0173</b>           | <b>0.0173</b>       | <b>0.006</b>      | <b>0.345</b>          | <b>1.158</b> | <b>0.864</b> |
| <b>Max. strike acceleration</b>       | <b>0.6727</b>           | <b>0.0000</b>       | <b>0.014</b>      | <b>1.535</b>          | <b>1.385</b> | <b>0.722</b> |
| <b>Max. gape angular velocity</b>     | <b>0.9863</b>           | <b>0.0000</b>       | <b>0.012</b>      | <b>1.546</b>          | <b>1.304</b> | <b>0.767</b> |
| <b>Max. gape angular acceleration</b> | <b>0.0143</b>           | <b>0.0013</b>       | <b>0.013</b>      | <b>3.481</b>          | <b>1.341</b> | <b>0.746</b> |
| <b>Min. time to max gape</b>          | <b>0.1365</b>           | <b>0.003</b>        | <b>-0.010</b>     | <b>2.040</b>          | <b>0.791</b> | <b>1.264</b> |
| Strike distance                       | NA                      | 0.5072              | 0.004             | 1.055                 | 1.098        | 0.911        |
| Strike latency                        | NA                      | 0.1298              | -0.031            | 2.463                 | 0.492        | 2.033        |
| Mean strike velocity                  | 0.1260                  | 0.1003              | 0.008             | -0.048                | 1.192        | 0.839        |
| <b>20-30°C</b>                        |                         |                     |                   |                       |              |              |
| Max. strike velocity                  | 0.0263                  | 0.1625              | 0.005             | 0.433                 | 1.122        | 0.891        |
| <b>Max. strike acceleration</b>       | <b>0.6842</b>           | <b>0.0058</b>       | <b>0.016</b>      | <b>1.527</b>          | <b>1.459</b> | <b>0.685</b> |
| Max. gape angular velocity            | 0.8541                  | 0.1682              | 0.006             | 1.709                 | 1.159        | 0.863        |
| Max. gape angular acceleration        | 0.9239                  | 0.5003              | -0.004            | 3.920                 | 0.910        | 1.099        |
| Min. time to max gape                 | 0.1018                  | 0.2497              | -0.005            | 1.923                 | 0.884        | 1.131        |
| Strike distance                       | NA                      | 0.2367              | 0.010             | 0.957                 | 1.258        | 0.795        |
| Strike latency                        | NA                      | 0.0594              | -0.057            | 2.860                 | 0.268        | 3.731        |
| <b>Mean strike velocity</b>           | <b>0.0004</b>           | <b>0.0006</b>       | <b>0.016</b>      | <b>-0.197</b>         | <b>1.433</b> | <b>0.698</b> |
| <b>25-35°C</b>                        |                         |                     |                   |                       |              |              |
| Max. strike velocity                  | 0.0358                  | 0.0934              | 0.005             | 0.411                 | 1.119        | 0.894        |
| <b>Max. strike acceleration</b>       | <b>0.5396</b>           | <b>0.0152</b>       | <b>0.015</b>      | <b>1.522</b>          | <b>1.398</b> | <b>0.715</b> |
| <b>Max. gape angular velocity</b>     | <b>0.7225</b>           | <b>0.0479</b>       | <b>0.006</b>      | <b>1.729</b>          | <b>1.157</b> | <b>0.864</b> |
| <b>Max. gape angular acceleration</b> | <b>0.0031</b>           | <b>0.0010</b>       | <b>0.020</b>      | <b>3.234</b>          | <b>1.577</b> | <b>0.634</b> |
| <b>Min. time to max gape</b>          | <b>0.4375</b>           | <b>0.0017</b>       | <b>-0.017</b>     | <b>2.291</b>          | <b>0.672</b> | <b>1.488</b> |
| Strike distance                       | NA                      | 0.0691              | 0.013             | 0.751                 | 1.342        | 0.745        |
| Strike latency                        | NA                      | 0.7603              | 0.013             | 0.897                 | 1.353        | 0.739        |
| Mean strike velocity                  | 0.5365                  | 0.8791              | 0.001             | 0.204                 | 1.024        | 0.977        |

**Table S3: Results of generalized linear mixed models examining the effects of cloacal temperature and strike distance on western rattlesnake strike performance. Bolded rows indicate a statistically significant effect of temperature.**

| Variable                       | Strike distance P-value | Temperature P-value | Temperature slope | Temperature intercept | Q10          | 1/Q10        |
|--------------------------------|-------------------------|---------------------|-------------------|-----------------------|--------------|--------------|
| <b>15-25°C</b>                 |                         |                     |                   |                       |              |              |
| Max. strike velocity           | <b>0.4755</b>           | <b>0.0034</b>       | <b>0.011</b>      | <b>0.323</b>          | <b>1.290</b> | <b>0.775</b> |
| Max. strike acceleration       | <b>0.0683</b>           | <b>0.0347</b>       | <b>0.017</b>      | <b>1.662</b>          | <b>1.469</b> | <b>0.681</b> |
| Max. gape angular velocity     | <b>0.8588</b>           | <b>0.0000</b>       | <b>0.017</b>      | <b>1.471</b>          | <b>1.474</b> | <b>0.678</b> |
| Max. gape angular acceleration | <b>0.0533</b>           | <b>0.0460</b>       | <b>0.015</b>      | <b>3.479</b>          | <b>1.411</b> | <b>0.709</b> |
| Min. time to max gape          | <b>0.0047</b>           | <b>0.0083</b>       | <b>-0.008</b>     | <b>2.074</b>          | <b>0.827</b> | <b>1.209</b> |
| Strike distance                | NA                      | <b>0.0394</b>       | <b>0.014</b>      | <b>0.949</b>          | <b>1.372</b> | <b>0.729</b> |
| Strike latency                 | NA                      | 0.0607              | -0.039            | 1.939                 | 0.408        | 2.451        |
| Mean strike velocity           | <b>0.3644</b>           | <b>0.0137</b>       | <b>0.012</b>      | <b>-0.031</b>         | <b>1.305</b> | <b>0.766</b> |
| <b>15-35°C</b>                 |                         |                     |                   |                       |              |              |
| Max. strike velocity           | <b>0.0669</b>           | <b>0.0048</b>       | <b>0.004</b>      | <b>0.447</b>          | <b>1.102</b> | <b>0.907</b> |
| Max. strike acceleration       | <b>0.7036</b>           | <b>0.0017</b>       | <b>0.007</b>      | <b>1.820</b>          | <b>1.181</b> | <b>0.847</b> |
| Max. gape angular velocity     | <b>0.6954</b>           | <b>0.0000</b>       | <b>0.012</b>      | <b>1.555</b>          | <b>1.315</b> | <b>0.760</b> |
| Max. gape angular acceleration | <b>0.0762</b>           | <b>0.0268</b>       | <b>0.012</b>      | <b>3.560</b>          | <b>1.321</b> | <b>0.757</b> |
| Min. time to max gape          | <b>0.0055</b>           | <b>0.0004</b>       | <b>-0.008</b>     | <b>2.081</b>          | <b>0.837</b> | <b>1.195</b> |
| Strike distance                | NA                      | <b>0.0053</b>       | <b>0.010</b>      | <b>1.026</b>          | <b>1.247</b> | <b>0.802</b> |
| Strike latency                 | NA                      | 0.6664              | -0.005            | 1.377                 | 0.886        | 1.129        |
| Mean strike velocity           | <b>0.3553</b>           | <b>0.0109</b>       | <b>0.006</b>      | <b>0.053</b>          | <b>1.157</b> | <b>0.864</b> |
| <b>20-30°C</b>                 |                         |                     |                   |                       |              |              |
| Max. strike velocity           | 0.1030                  | 0.0609              | 0.005             | 0.451                 | 1.116        | 0.896        |
| Max. strike acceleration       | 0.2095                  | 0.1269              | 0.004             | 1.938                 | 1.098        | 0.911        |
| Max. gape angular velocity     | <b>0.7317</b>           | <b>0.0000</b>       | <b>0.013</b>      | <b>1.542</b>          | <b>1.357</b> | <b>0.737</b> |
| Max. gape angular acceleration | <b>0.4121</b>           | <b>0.0014</b>       | <b>0.020</b>      | <b>3.369</b>          | <b>1.595</b> | <b>0.627</b> |
| Min. time to max gape          | 0.0808                  | 0.0808              | -0.006            | 1.999                 | 0.875        | 1.143        |
| Strike distance                | NA                      | 0.9542              | 0.000             | 1.290                 | 0.995        | 1.005        |
| Strike latency                 | NA                      | 0.9547              | -0.001            | 1.111                 | 0.982        | 1.018        |
| Mean strike velocity           | 0.2850                  | 0.0884              | 0.004             | 0.134                 | 1.094        | 0.914        |
| <b>25-35°C</b>                 |                         |                     |                   |                       |              |              |
| Max. strike velocity           | 0.5764                  | 0.9533              | 0.000             | 0.598                 | 1.002        | 0.998        |
| Max. strike acceleration       | 0.0002                  | 0.8723              | -0.001            | 2.099                 | 0.980        | 1.020        |
| Max. gape angular velocity     | <b>0.6840</b>           | <b>0.0279</b>       | <b>0.007</b>      | <b>1.709</b>          | <b>1.186</b> | <b>0.843</b> |
| Max. gape angular acceleration | 0.0934                  | 0.0653              | 0.015             | 3.455                 | 1.415        | 0.707        |
| Min. time to max gape          | 0.0065                  | 0.3355              | -0.003            | 1.952                 | 0.926        | 1.080        |
| Strike distance                | NA                      | 0.1854              | 0.008             | 1.091                 | 1.192        | 0.839        |
| Strike latency                 | NA                      | 0.4402              | 0.021             | 0.496                 | 1.625        | 0.615        |
| Mean strike velocity           | 0.1388                  | 0.6222              | 0.001             | 0.232                 | 1.025        | 0.976        |

**Table S4:** Results of generalized linear mixed models examining the effects of species, cloacal temperature, and their interaction on strike performance variables. All models also include snake ID as a random effect, and, except for models assessing strike distance and strike latency, include strike distance as a covariate. Bolded values indicate a significant temperature effect.

| Variable                       | 15–25°C                 |                         | 15–35°C                 |                         | 20–30°C                 |                         | 25–35°C                 |                         |
|--------------------------------|-------------------------|-------------------------|-------------------------|-------------------------|-------------------------|-------------------------|-------------------------|-------------------------|
|                                | Temp:Species<br>F-ratio | Temp:Species<br>P-value | Temp:Species<br>F-ratio | Temp:Species<br>P-value | Temp:Species<br>F-ratio | Temp:Species<br>P-value | Temp:Species<br>F-ratio | Temp:Species<br>P-value |
| Max. gape angular acceleration | 0.1788                  | 0.6785                  | 0.0523                  | 0.8204                  | 8.7389                  | <b>0.0086</b>           | 0.0264                  | 0.8726                  |
| Min. time to max gape          | 0.1494                  | 0.7036                  | 0.5405                  | 0.4736                  | 0.0217                  | 0.8839                  | 1.2769                  | 0.2753                  |
| Max. gape angular velocity     | 0.0029                  | 0.9573                  | 0.1423                  | 0.7099                  | 2.2167                  | 0.146                   | 0.0803                  | 0.7785                  |
| Max. strike acceleration       | 0.2035                  | 0.6573                  | 3.919                   | 0.055                   | 10.3365                 | <b>0.0029</b>           | 1.2926                  | 0.2722                  |
| Max. strike velocity           | 0.9282                  | 0.3497                  | 5.8027                  | <b>0.0308</b>           | 0.05                    | 0.8255                  | 4.0043                  | 0.0623                  |
| Mean strike velocity           | 1.446                   | 0.2462                  | 6.0369                  | <b>0.0244</b>           | 0.7943                  | 0.3842                  | 6.4148                  | <b>0.0217</b>           |
| Strike distance                | 0.046                   | 0.8326                  | 0.2033                  | 0.6591                  | 2.3615                  | 0.1444                  | 0.0052                  | 0.9435                  |
| Strike latency                 | 2.1116                  | 0.1646                  | 1.9994                  | 0.1746                  | 4.85                    | 0.0545                  | 0.0462                  | 0.8324                  |

**Table S5:** Results of generalized linear models examining the effect of species within each temperature treatment on strike performance. bolded values indicate a significant temperature effect.

| Variable                       | 15°C    |               | 20°C    |               | 25°C    |         | 30°C    |               | 35°C    |               |
|--------------------------------|---------|---------------|---------|---------------|---------|---------|---------|---------------|---------|---------------|
|                                | F-ratio | P-value       | F-ratio | P-value       | F-ratio | P-value | F-ratio | P-value       | F-ratio | P-value       |
| Max. gape angular acceleration | 0.1722  | 0.6831        | 0.3669  | 0.5532        | 0.0351  | 0.8537  | 7.0268  | <b>0.0163</b> | 0.2611  | 0.6147        |
| Min. time to max gape          | 20.6835 | <b>0.0001</b> | 7.8936  | <b>0.0126</b> | 3.7924  | 0.0693  | 1.3723  | 0.2567        | 11.6931 | <b>0.0026</b> |
| Max. gape angular velocity     | 0.0473  | 0.8303        | 0.449   | 0.5124        | 0.0294  | 0.8661  | 2.7883  | 0.1123        | 0.0831  | 0.776         |
| Max. strike acceleration       | 9.5708  | <b>0.0063</b> | 6.6051  | <b>0.0206</b> | 0.7384  | 0.4021  | 2.5313  | 0.129         | 0.0467  | 0.831         |
| Max. strike velocity           | 5.9938  | <b>0.0248</b> | 0.3543  | 0.56          | 1.61    | 0.2216  | 0.0003  | 0.9875        | 0.262   | 0.6141        |
| Mean strike velocity           | 1.6802  | 0.2113        | 0.2585  | 0.6181        | 0.0079  | 0.9303  | 0.2707  | 0.6092        | 0.6418  | 0.432         |
| Strike distance                | 0.8317  | 0.3738        | 2.0562  | 0.1708        | 0.4199  | 0.5257  | 0.0137  | 0.9082        | 2.7601  | 0.1115        |
| Strike latency                 | 7.8968  | <b>0.012</b>  | 0.2977  | 0.5986        | 0.0675  | 0.7988  | 0.0092  | 0.9247        | 0.2007  | 0.6588        |

**Table S6:** Summary table of performance values for all recorded western rattlesnake and Mohave rattlesnake defensive strikes (as opposed to summaries of maximum values only presented in Table 1) .

| Variable                                              | 15°C    |         |          | 20°C    |         |          | 25°C    |         |          | 30°C    |         |          | 35°C    |         |          |
|-------------------------------------------------------|---------|---------|----------|---------|---------|----------|---------|---------|----------|---------|---------|----------|---------|---------|----------|
|                                                       | Average | Min     | Max      |
| <b>Western rattlesnakes</b>                           |         |         |          |         |         |          |         |         |          |         |         |          |         |         |          |
| Max. strike velocity (m s <sup>-1</sup> )             | 2.96    | 2.17    | 3.73     | 3.31    | 2.31    | 4.41     | 3.73    | 2.76    | 5.17     | 3.77    | 2.73    | 5.09     | 3.59    | 2.28    | 5.15     |
| Max. strike acceleration (m s <sup>-2</sup> )         | 72.79   | 43.66   | 112.83   | 89.87   | 59.68   | 134.96   | 111.56  | 56.39   | 319.88   | 104.56  | 77.46   | 146.43   | 102.20  | 65.88   | 160.31   |
| Max. gape angular velocity (rad s <sup>-1</sup> )     | 52.82   | 38.20   | 86.14    | 60.52   | 40.93   | 83.48    | 70.27   | 39.57   | 92.21    | 83.25   | 53.36   | 116.31   | 86.01   | 58.88   | 136.86   |
| Max. gape angular acceleration (rad s <sup>-2</sup> ) | 4692.94 | 1553.30 | 18397.41 | 5066.47 | 1719.33 | 11419.93 | 5785.40 | 2498.10 | 11482.01 | 8933.43 | 3166.13 | 20889.15 | 7827.36 | 2915.32 | 18514.58 |
| Min. time to max gape (ms)                            | 93.29   | 72.00   | 124.00   | 88.59   | 64.00   | 132.00   | 84.71   | 48.00   | 112.00   | 78.25   | 40.00   | 152.00   | 82.80   | 44.00   | 180.00   |
| Strike distance (cm)                                  | 14.19   | 7.70    | 27.60    | 16.64   | 7.60    | 34.10    | 17.96   | 6.60    | 31.30    | 16.98   | 7.00    | 30.40    | 21.08   | 5.10    | 35.50    |
| Strike latency (ms)                                   | 28.73   | 4.00    | 79.00    | 23.86   | 1.00    | 86.00    | 18.27   | 3.00    | 102.00   | 41.67   | 1.00    | 312.00   | 41.75   | 3.00    | 258.00   |
| <b>Mohave rattlesnakes</b>                            |         |         |          |         |         |          |         |         |          |         |         |          |         |         |          |
| Max. strike velocity (m s <sup>-1</sup> )             | 2.49    | 1.52    | 3.18     | 3.07    | 1.53    | 4.20     | 3.39    | 2.50    | 4.81     | 3.58    | 2.31    | 5.32     | 3.51    | 1.79    | 5.26     |
| Max. strike acceleration (m s <sup>-2</sup> )         | 60.66   | 37.62   | 81.51    | 73.43   | 37.52   | 112.13   | 87.94   | 55.17   | 145.33   | 108.43  | 62.93   | 147.13   | 110.13  | 71.04   | 182.20   |
| Max. gape angular velocity (rad s <sup>-1</sup> )     | 53.21   | 41.14   | 73.44    | 63.96   | 45.24   | 85.01    | 70.67   | 58.28   | 94.79    | 74.34   | 49.45   | 107.89   | 82.64   | 63.49   | 108.48   |
| Max. gape angular acceleration (rad s <sup>-2</sup> ) | 4433.70 | 2141.27 | 11424.00 | 5257.48 | 2811.16 | 8610.11  | 5001.85 | 2874.14 | 9148.76  | 5424.34 | 3082.52 | 10964.47 | 6806.63 | 4021.71 | 14397.84 |
| Min. time to max gape (ms)                            | 81.39   | 60.00   | 136.00   | 73.25   | 56.00   | 96.00    | 72.47   | 56.00   | 104.00   | 65.50   | 40.00   | 96.00    | 58.34   | 32.00   | 76.00    |
| Strike distance (cm)                                  | 10.30   | 4.00    | 25.30    | 13.66   | 5.70    | 23.00    | 14.43   | 6.50    | 25.40    | 16.12   | 6.30    | 33.80    | 14.77   | 4.50    | 34.50    |
| Strike latency (ms)                                   | 112.25  | 14.00   | 280.00   | 18.75   | 4.00    | 27.00    | 75.80   | 1.00    | 283.00   | 57.75   | 1.00    | 233.00   | 83.27   | 1.00    | 260.00   |

## Movies

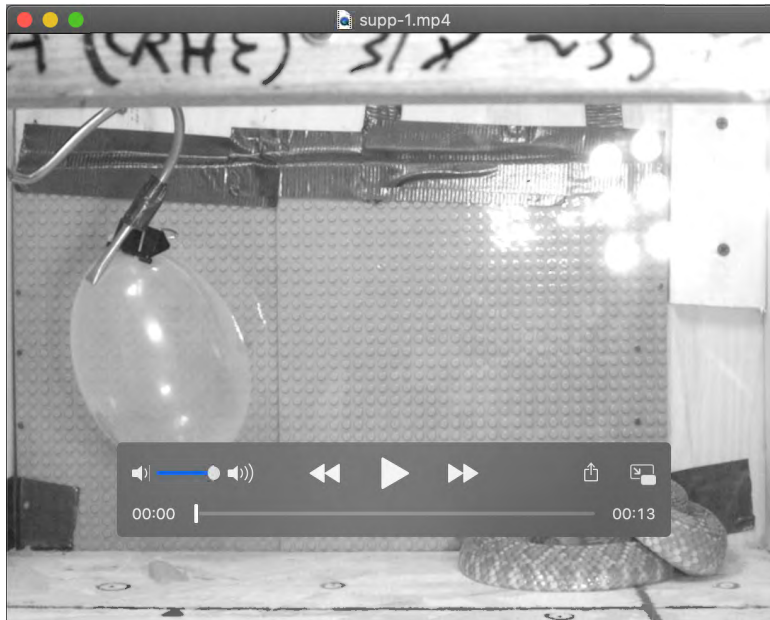

Movie 1. A defensive strike that hit the target in the 20°C treatment.

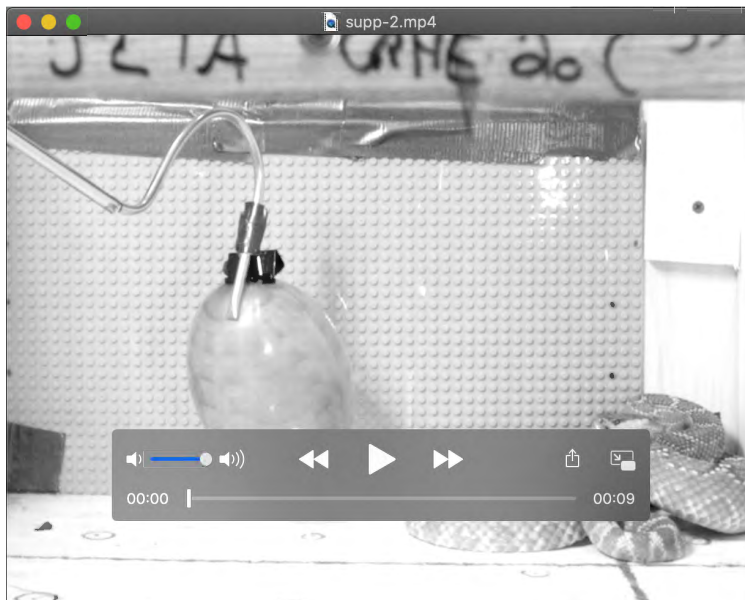

Movie 2. A defensive strike that missed the target in the 35°C treatment.
